# Supplementary material for: The fabrication of a highly conductive ceria-embedded gadolinium-stabilized bismuth oxide nanocomposite solid electrolyte for low-temperature solid oxide fuel cells
Source: Royal Society of Chemistry journal article supplement (doi:10.1039/d1ma01254a), 2022-01-01
Supplement: d1ma01254a1.pdf [file d1ma01254a1.pdf]

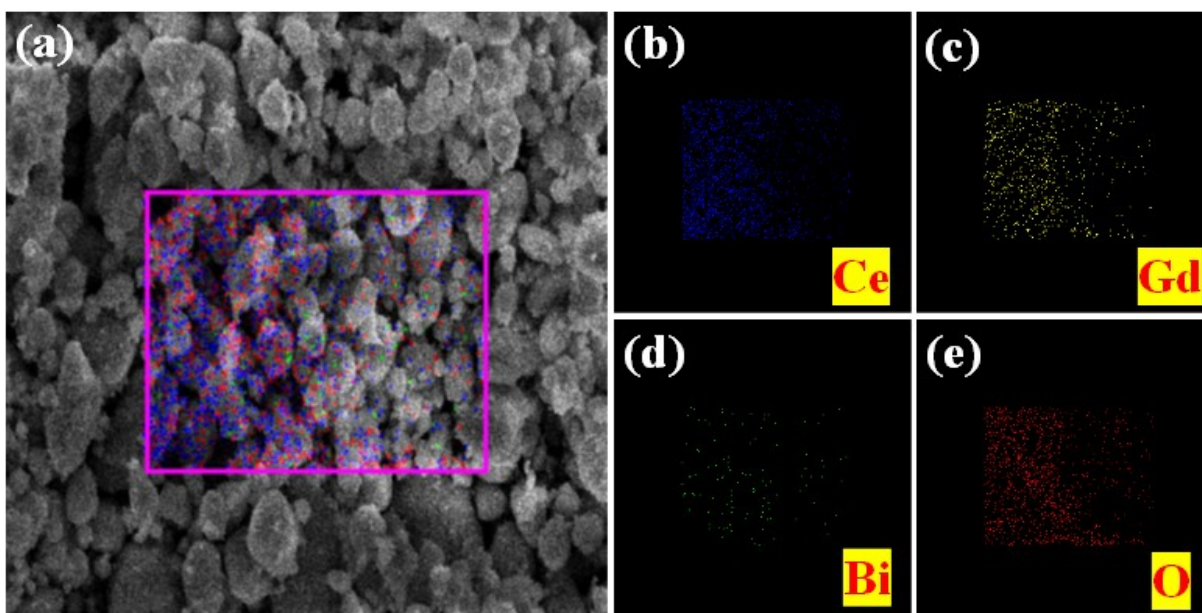

**Fig. S1:** Elemental mapping of Ce, Gd, Bi, and O of GDBC nanocomposite solid electrolyte with 40 wt. % CeO<sub>2</sub>.

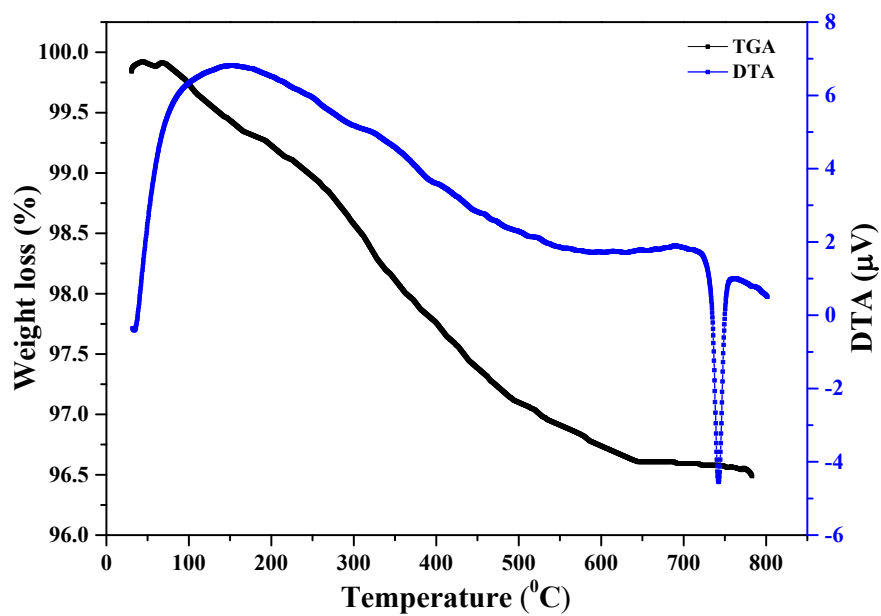

**Fig. S2:** TGA/DTA curves of GDBC nanocomposite solid electrolyte with 40 wt. % of CeO<sub>2</sub>.
